# Supplementary material for: Recombinant Antimicrobial Peptide OaBac5mini Alleviates Inflammation in Pullorum Disease Chicks by Modulating TLR4/MyD88/NF-κB Pathway
Source: MDPI journal article supplement (doi:10.3390/ani13091515), 2023-04-30
Supplement: s1 [file s1]

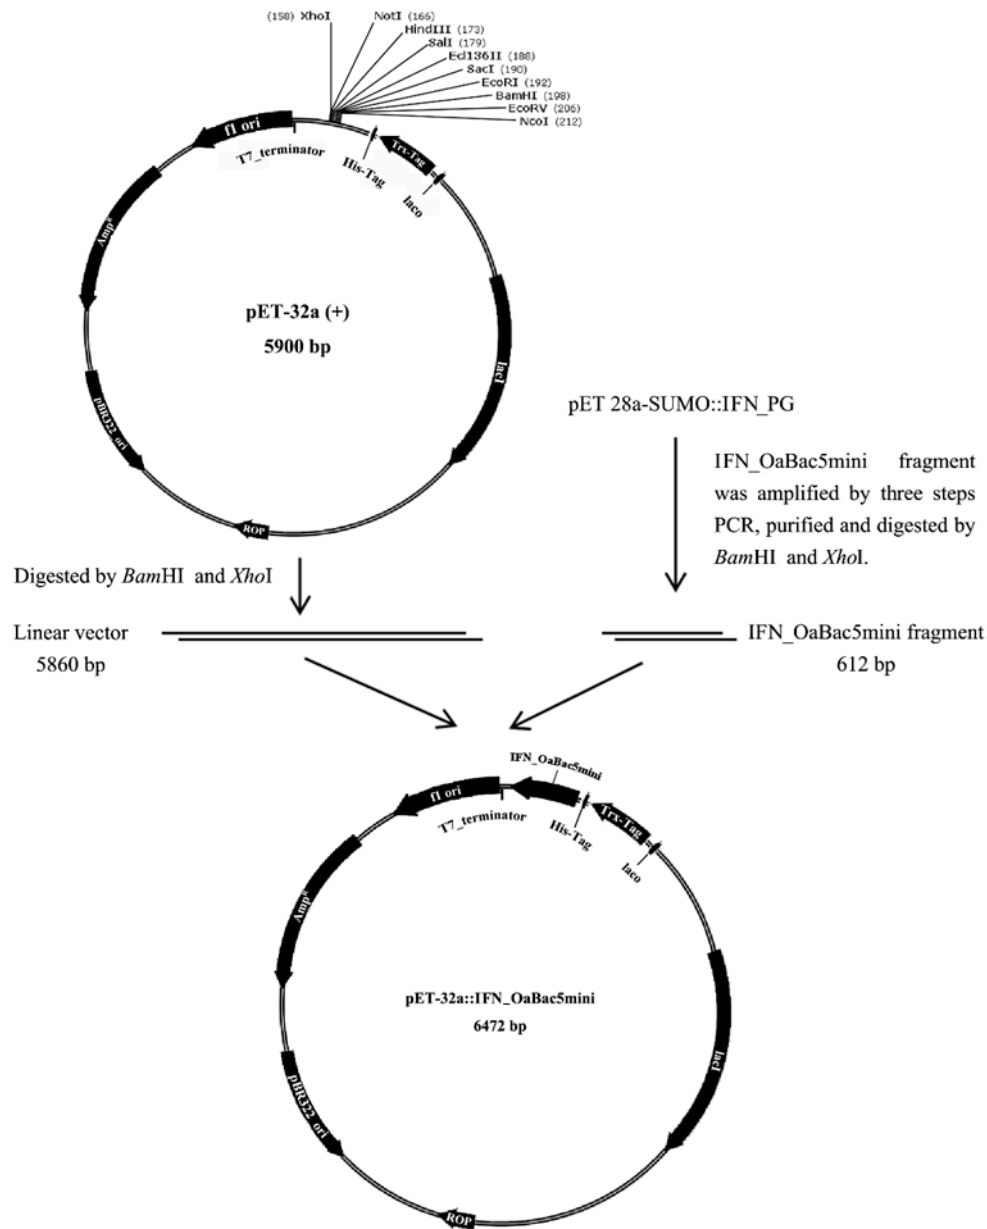

Figure S1 Construction strategy for recombinant expression vector pET-32a::IFN\_OaBac5mini. IFN\_OaBac5mini fragment was amplified by three steps PCR using pET 28a-SUMO:IFN\_PG as original template. IFN\_OaBac5mini fragment (612 bp) and pET-32a (+) plasmid were digested with *Bam*HI and *Xho*I, purified and recombined to construct the recombinant expression vector.

**Table S1 MICs of different antibiotic agents against *S. Pullorum* CVCC 530 (unit: µg/mL)**

| Antibacterial agents | MICs  |
|----------------------|-------|
| florfenicol          | 4     |
| kanamycin            | 2.67  |
| tetracycline         | 53.33 |
| OaBac5mini           | 1.56  |
